# Supplementary material
Source: PubMed Central journal article supplement (PMC3850752)
Supplement: NIHMS529450-supplement-Elemental_analysis.pdf [file NIHMS529450-supplement-Elemental_analysis.pdf]

**APPENDIX: Elemental Analyses**

| Compd | Formula                                                                                 | Calcd, % |      |       |       |       | Found % |      |       |       |       |
|-------|-----------------------------------------------------------------------------------------|----------|------|-------|-------|-------|---------|------|-------|-------|-------|
|       |                                                                                         | C        | H    | N     | S     | Cl/Br | C       | H    | N     | S     | Cl/Br |
| 2     | C <sub>20</sub> H <sub>22</sub> N <sub>6</sub> SO <sub>5</sub> · 1.80H <sub>2</sub> O   | 48.93    | 5.26 | 17.12 | 6.53  |       | 48.66   | 5.04 | 16.81 | 6.45  |       |
| 3     | C <sub>18</sub> H <sub>17</sub> N <sub>5</sub> S                                        | 64.45    | 5.11 | 20.88 | 9.56  |       | 64.41   | 5.09 | 20.92 | 9.49  |       |
| 4     | C <sub>18</sub> H <sub>17</sub> N <sub>5</sub> S · 0.20H <sub>2</sub> O                 | 63.77    | 5.17 | 20.66 | 9.46  |       | 63.68   | 5.07 | 20.95 | 9.26  |       |
| 5     | C <sub>14</sub> H <sub>14</sub> N <sub>6</sub> O <sub>2</sub> S · 0.40H <sub>2</sub> O  | 49.81    | 4.42 | 24.90 | 9.50  |       | 49.94   | 4.52 | 24.90 | 9.35  |       |
| 6     | C <sub>14</sub> H <sub>14</sub> N <sub>5</sub> SBr · 0.30H <sub>2</sub> O               | 45.49    | 3.98 | 18.94 | 8.67  | 21.62 | 45.61   | 3.92 | 18.70 | 8.52  | 21.87 |
| 7     | C <sub>14</sub> H <sub>14</sub> N <sub>5</sub> SCl                                      | 52.58    | 4.41 | 21.90 | 10.03 | 11.09 | 52.54   | 4.42 | 21.87 | 9.95  | 11.32 |
| 8     | C <sub>14</sub> H <sub>14</sub> N <sub>5</sub> SCl · 0.40H <sub>2</sub> O               | 51.42    | 4.56 | 21.42 | 9.80  | 10.84 | 51.61   | 4.49 | 21.31 | 9.69  | 10.62 |
| 9     | C <sub>14</sub> H <sub>13</sub> N <sub>5</sub> SCl <sub>2</sub>                         | 47.47    | 3.70 | 19.77 | 9.05  | 20.02 | 47.46   | 3.84 | 19.57 | 8.92  | 19.76 |
| 10    | C <sub>14</sub> H <sub>13</sub> N <sub>5</sub> SCl <sub>2</sub> · 0.02CHCl <sub>3</sub> | 47.22    | 3.68 | 19.64 | 8.99  | 20.48 | 47.09   | 3.71 | 19.56 | 8.89  | 20.48 |
| 11    | C <sub>14</sub> H <sub>13</sub> N <sub>5</sub> SCl <sub>2</sub>                         | 47.47    | 3.70 | 19.77 | 9.05  | 20.02 | 47.70   | 3.76 | 19.78 | 9.03  | 20.11 |
| 12    | C <sub>15</sub> H <sub>17</sub> N <sub>5</sub> SO                                       | 57.12    | 5.43 | 22.20 | 10.17 |       | 56.88   | 5.45 | 21.83 | 9.88  |       |
| 13    | C <sub>16</sub> H <sub>19</sub> N <sub>5</sub> SO <sub>2</sub>                          | 55.63    | 5.54 | 20.27 | 9.28  |       | 55.74   | 5.53 | 20.29 | 9.14  |       |
| 14    | C <sub>15</sub> H <sub>17</sub> N <sub>5</sub> SO                                       | 57.12    | 5.43 | 22.20 | 10.17 |       | 56.98   | 5.42 | 22.10 | 10.17 |       |
| 15    | C <sub>14</sub> H <sub>13</sub> N <sub>5</sub> S · 0.20H <sub>2</sub> O                 | 58.19    | 5.37 | 24.24 | 11.10 |       | 58.01   | 5.36 | 24.24 | 11.05 |       |
| 16    | C <sub>17</sub> H <sub>16</sub> N <sub>6</sub> S · 1.10H <sub>2</sub> O                 | 57.32    | 5.15 | 23.59 | 9.00  |       | 57.09   | 4.98 | 23.25 | 9.00  |       |
| 17    | C <sub>16</sub> H <sub>19</sub> N <sub>5</sub> S                                        | 61.31    | 6.11 | 22.34 | 10.23 |       | 61.08   | 6.11 | 23.33 | 10.22 |       |
